# Supplementary material for: Chemical solution deposition of the highly c-axis oriented apatite type lanthanum silicate thin films
Source: Royal Society of Chemistry journal article supplement (doi:10.1039/c5dt02569a), 2015-01-01
Supplement: c5dt02569a1.pdf [file c5dt02569a1.pdf]

## **Supplementary Information**

### **Chemical solution deposition of the highly *c*-axis oriented apatite type lanthanum silicate thin films**

Shigeo Hori,<sup>\*a</sup> Yasuhiro Takatani,<sup>a</sup> Hiroaki Kadoura,<sup>a</sup> Takeshi Uyama,<sup>a</sup> Satoru Fujita,<sup>a</sup> and Toshihiko Tani<sup>a,b</sup>

<sup>a</sup> Toyota Central Research and Development Labs. Inc., Nagakute, Aichi 480-1192, Japan

<sup>b</sup> Toyota Technological Institute, Nagoya, Aichi 468-8511, Japan

\*corresponding author, E-mail: e1679@mosk.tytlabs.co.jp

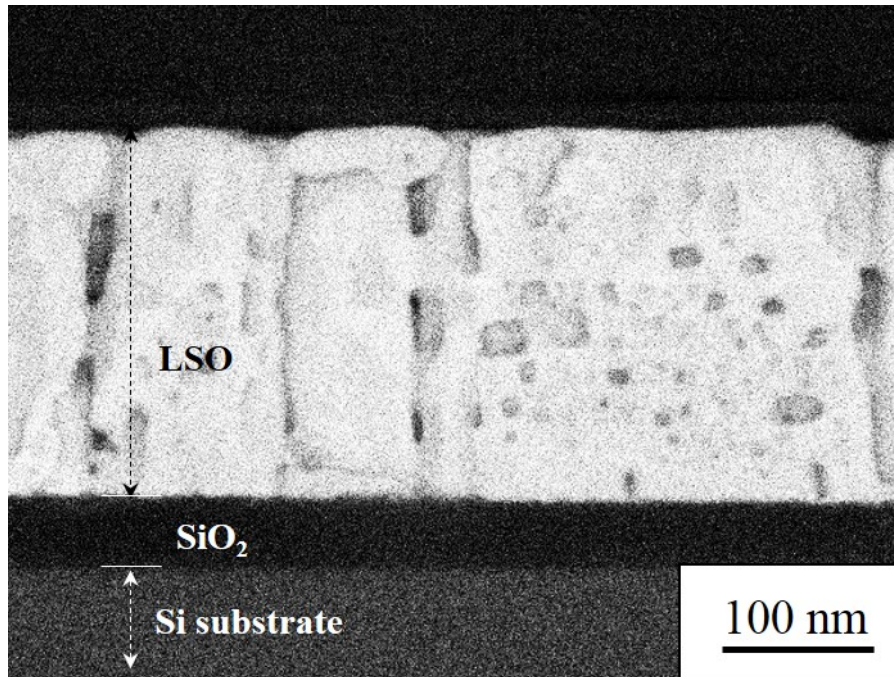

**Figure S1** Cross-sectional backscattered electron images of the highly *c*-axis oriented LSO thin film.

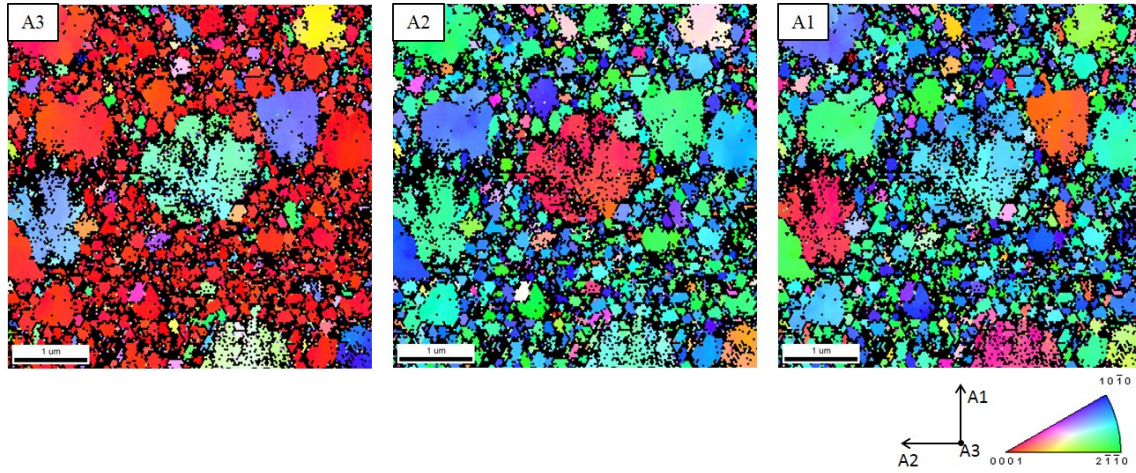

**Figure S2** Inverse pole figure maps with different observation directions.

Each domain exhibited a single color for each direction, which suggests a tri-axial orientation.

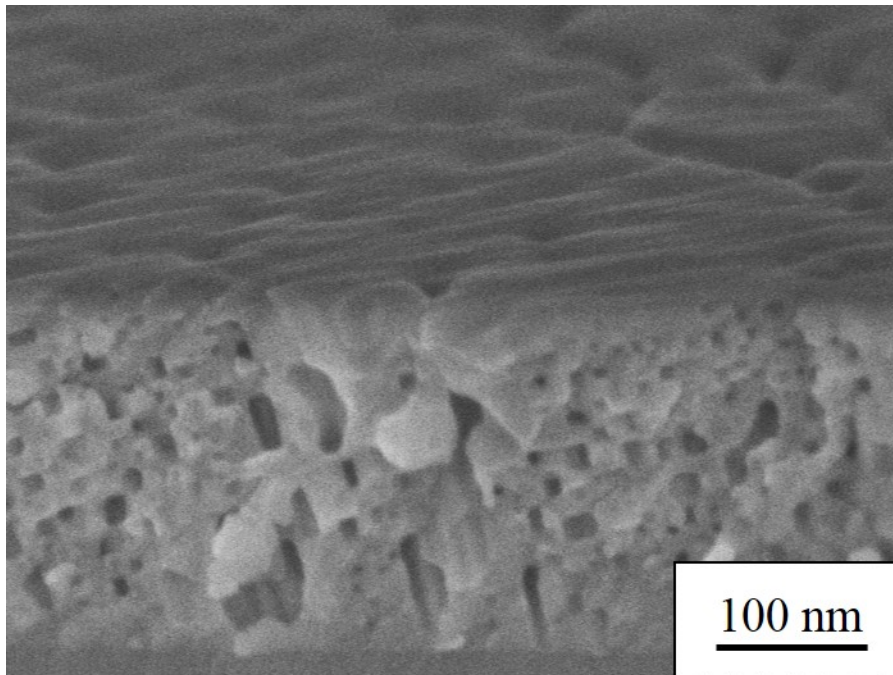

**Figure S3** Diagonal cross section of the domain of the LSO thin film prepared from non-refluxed solution.

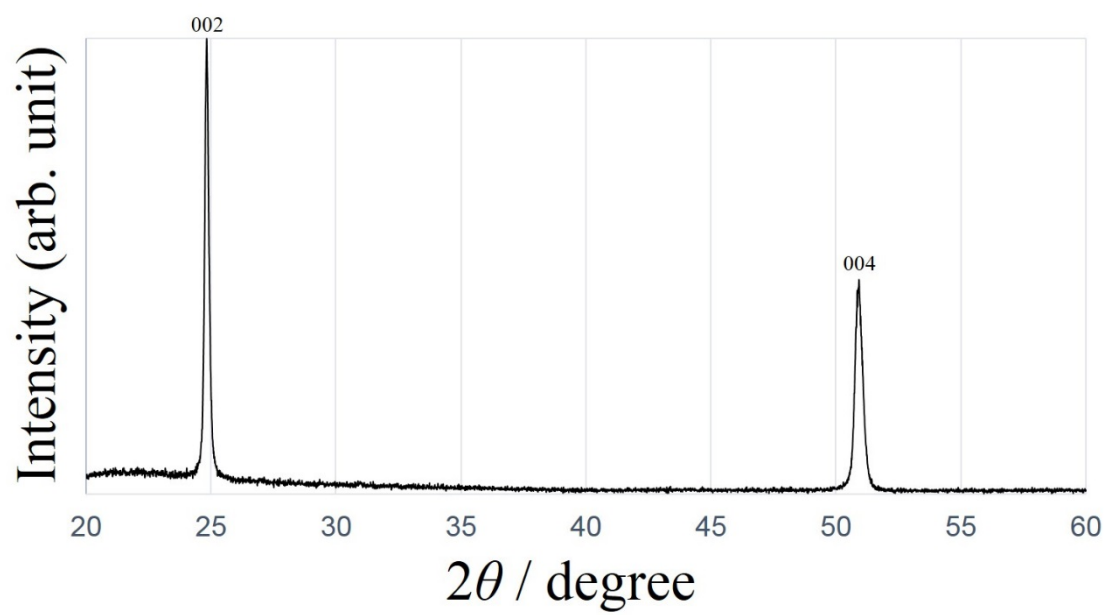

**Figure S4** XRD pattern for LSO thin film on a quartz glass substrate.

The LSO thin film was obtained by the same procedure described in the experimental section using a non-refluxed solution.

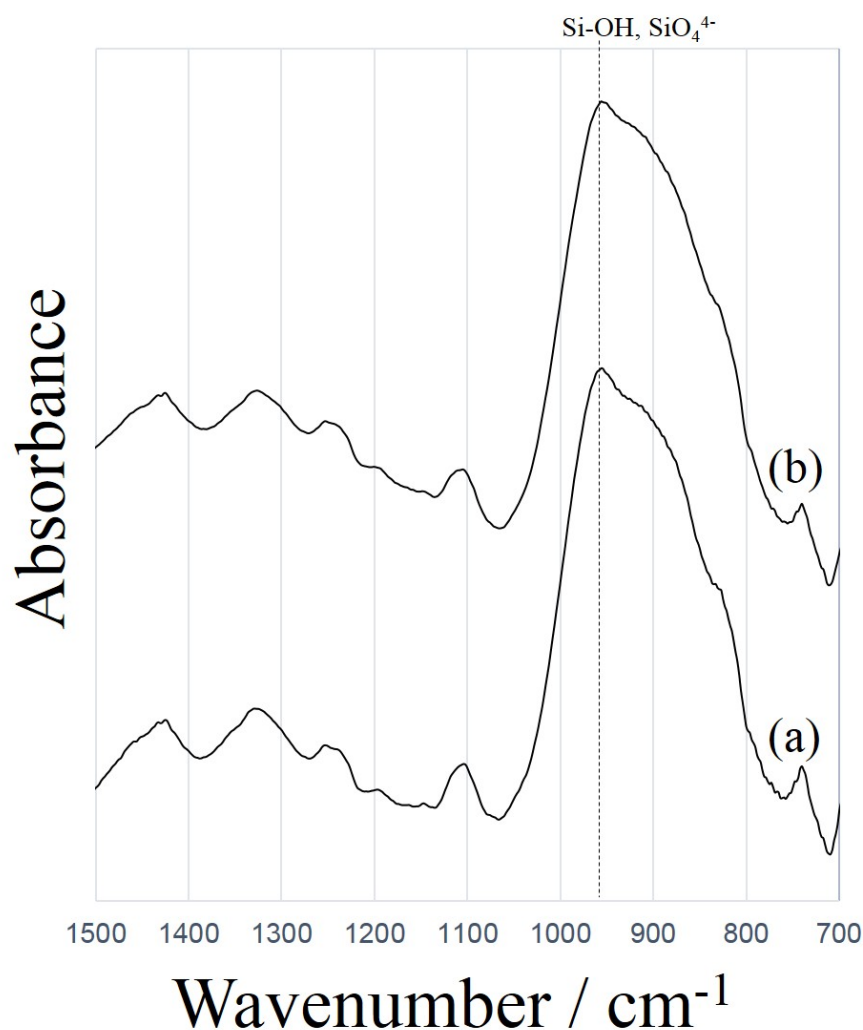

**Figure S5** FT-IR spectra of the LSO thin films prepared from (a) refluxed and (b) non-refluxed solutions. Both spectra were measured by ATR-mode and normalized at the maximum peak marked by broken line.

Both spectra were identical each other. Because thermal decomposition of  $\text{La}(\text{NO}_3)_3$  is known to result in  $\text{LaONO}_3$  at  $400^\circ\text{C}$ ,<sup>S1-S3</sup> broad two peaks from  $1280 - 1500 \text{ cm}^{-1}$  can be attributed to lanthanum nitrate which shows the peaks at  $1455, 1425, 1325, 1300 \text{ cm}^{-1}$ .<sup>S3</sup> Strong peak from  $800 - 1050 \text{ cm}^{-1}$  is known to be related to Si-OH and  $\text{SiO}_4^{4-}$ .<sup>S3</sup> Relative small siloxane (Si-O-Si) peak generally appears at ca.  $1080 \text{ cm}^{-1}$  interestingly suggests that Si-O bonding state in LSO precursor thin films are mainly  $\text{SiO}_4^{4-}$ . Other peaks at ca.  $750, 1200, 1250 \text{ cm}^{-1}$  derived from Si substrate.

## References

S1 H. Tagawa, *Yokohama-kokuritsudai Kankyoken Kiyo*, 1987, **14**, 41. (Written in Japanese)

S2 S. Mentus, D. Jelić and V. Grudić, *J. Therm. Anal. Calorim.*, 2007, **90**, 393.

S3 B. Ballinger, J. Motuzas, C. R. Miller, S. Smart and J. C. Diniz da Costa, *Scientific Reports*, 2015, **5**, 8210
